# Supplementary material
Source: ML conference proceedings conference paper supplement (https://openreview.net/forum?id=BltaWJZMeR)
Supplement: supplementary_material [file default of credit card clients.xls]

NOT FOUND
